# Supplementary material
Source: PubMed Central journal article supplement (PMC9107138)
Supplement: 10020_2022_484_MOESM1_ESM.pdf [file 10020_2022_484_MOESM1_ESM.pdf]

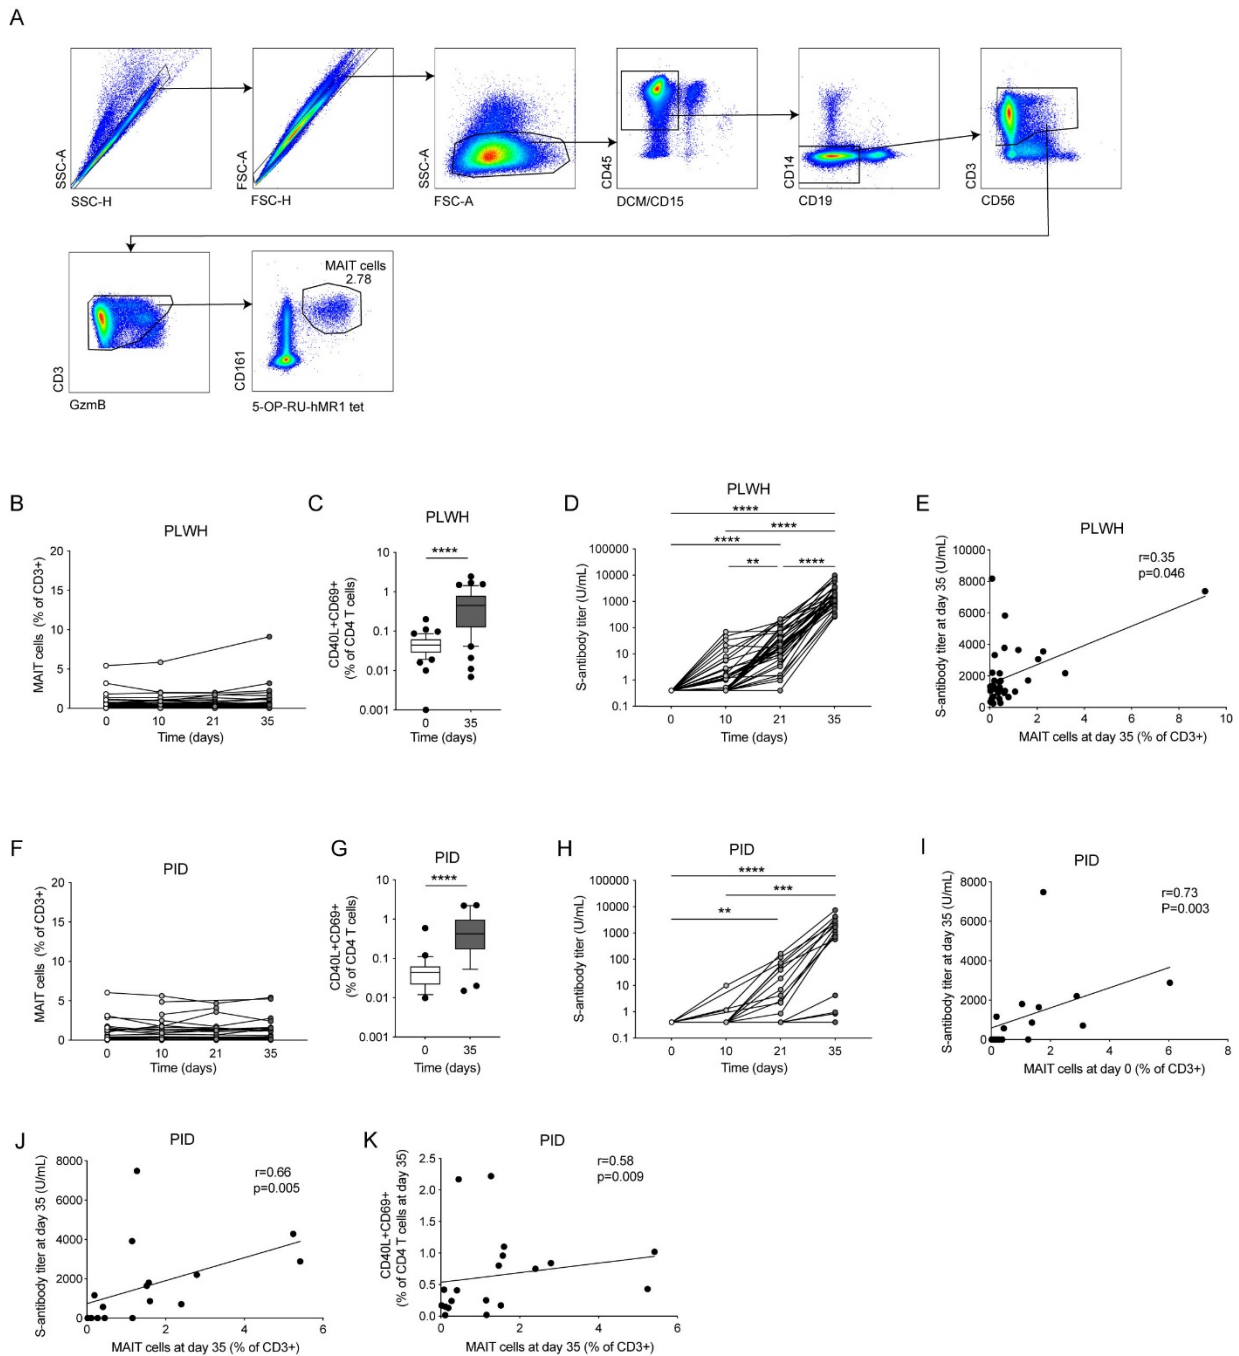

**Fig. S1.** MAIT cell associations with adaptive immune responses against the BNT162b2 mRNA vaccination in patients with primary and acquired immunodeficiency. (A) Gating strategy used to gate on MAIT cells in the phenotype panel. Note that the gate in the CD3 versus GzmB plot was added to eliminate false positive CD3+ cells derived from fluorescence spreading from the GzmB channel. (B) MAIT cell percentage in the people living with HIV (PLWH) group at different time points (n=37-41). (C) CD40L+CD69+ CD4 T cells after SARS-CoV-2 peptide pool stimulation before and after vaccination in the PLWH group (n=40-41). (D) Spike antibody titer at different time points in the PLWH group (n=38). (E) Correlation between the spike antibody titer at day 35 (n=38) and the MAIT cell percentage at day 35 in the PLWH group (n=37). (F) MAIT cell percentage in the primary immunodeficiency (PID) group at the different time points (n=19-24). (G) CD40L+CD69+ CD4 T cells after SARS-CoV-2 peptide pool stimulation before and after vaccination in the PID group (n=20-22). (H) Spike antibody titer at different time points in the PID group (n=12-20). Correlation between the spike antibody titer at day 35 (n=20) and MAIT cells percentage at day 0 (n=17) (I) and at day 35 (n=21) (J)

in the PID group. (K) Correlation between the percentage of CD40L+CD69+ CD4 T cells at day 35 (n=22) and the MAIT cell percentage at day 35 (n=21). Correlation was assessed using the Spearman rank correlation test in (E) and (I-H). Box show the median and interquartile range and whisker bars to 10th and 90th percentile. Mann-Whitney test was performed in (C) and (G). Kruskal-Wallis test followed by Dunn's multiple comparison was performed in (D) and (H). \*\*p<0.01; \*\*\*p<0.005; \*\*\*\*p<0.0001.

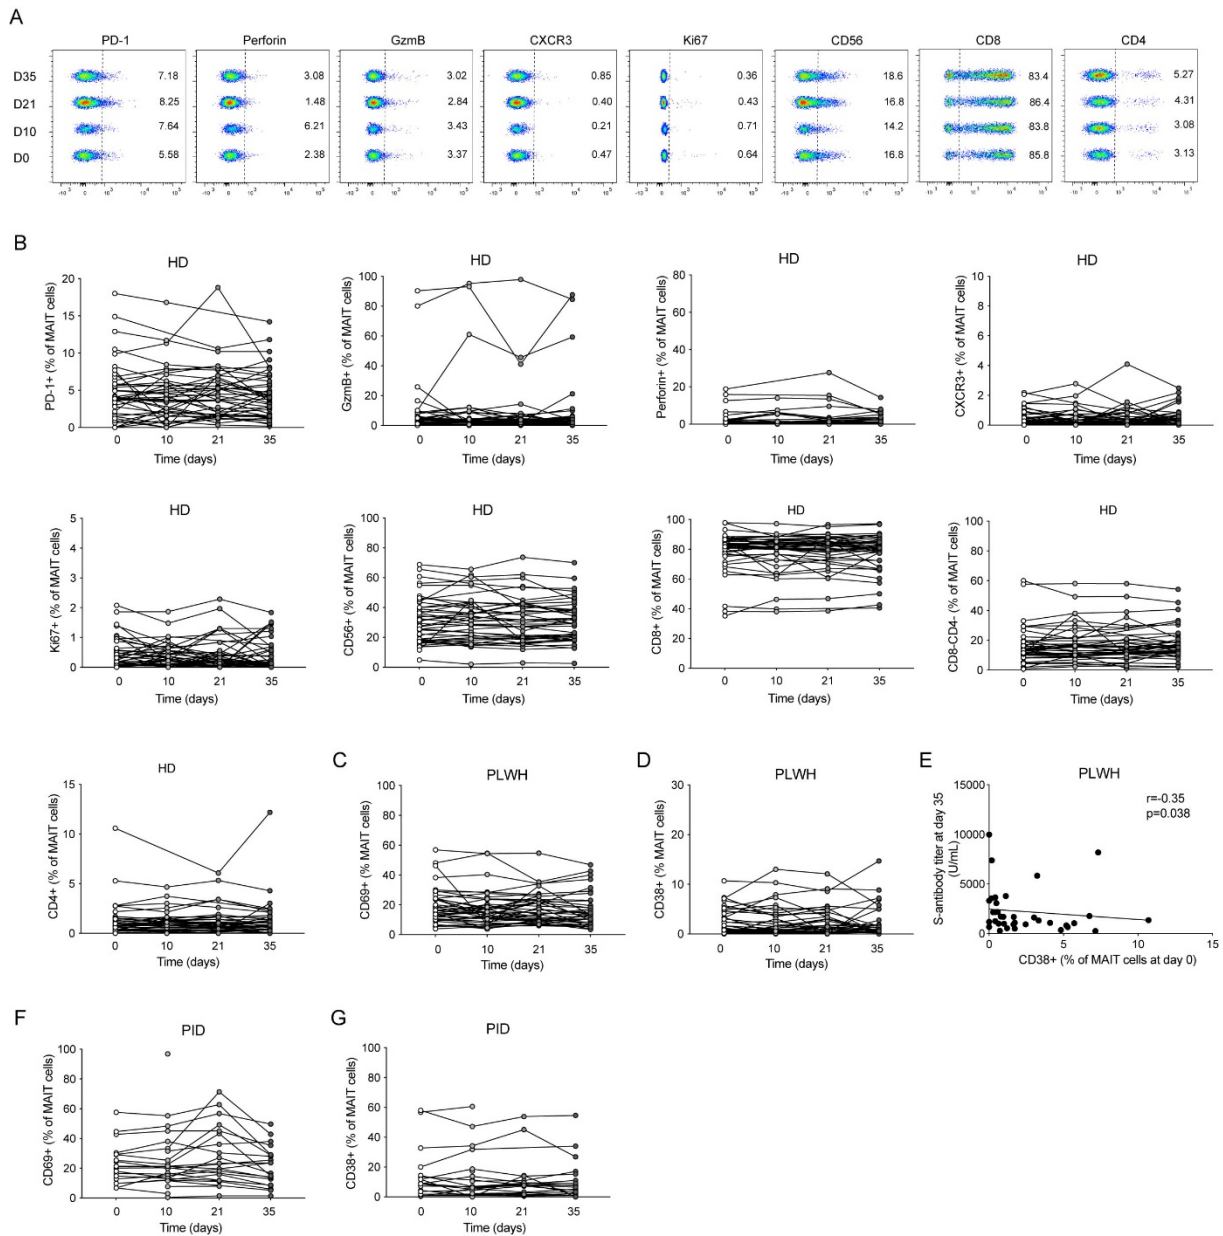

**Fig. S2.** MAIT cell phenotypic characteristics unchanged in patients with primary and acquired and immunodeficiency vaccinated with the BNT162b2 mRNA vaccine. Representative concatenated flow cytometry plots (A) and combined data (B) of the percentage of PD-1, Perforin, GzmB, CXCR3, Ki67, CD56, CD8 and CD4 on MAIT cells at different time points in the healthy donor (HD) group. Percentage of CD69+ (C) and CD38+ (D) MAIT cells at the different time points in the people living with HIV (PLWH) group (n=37-40). (E) Correlation between the spike antibody titer at day 35 (n=38) and the percentage of CD38+ MAIT cells at day 0 in the PLWH group (n=40). Correlation was assessed using the Spearman rank correlation test in (E). Kruskal-Wallis test followed by Dunn's multiple comparison was performed in (B, C, D, F and G).

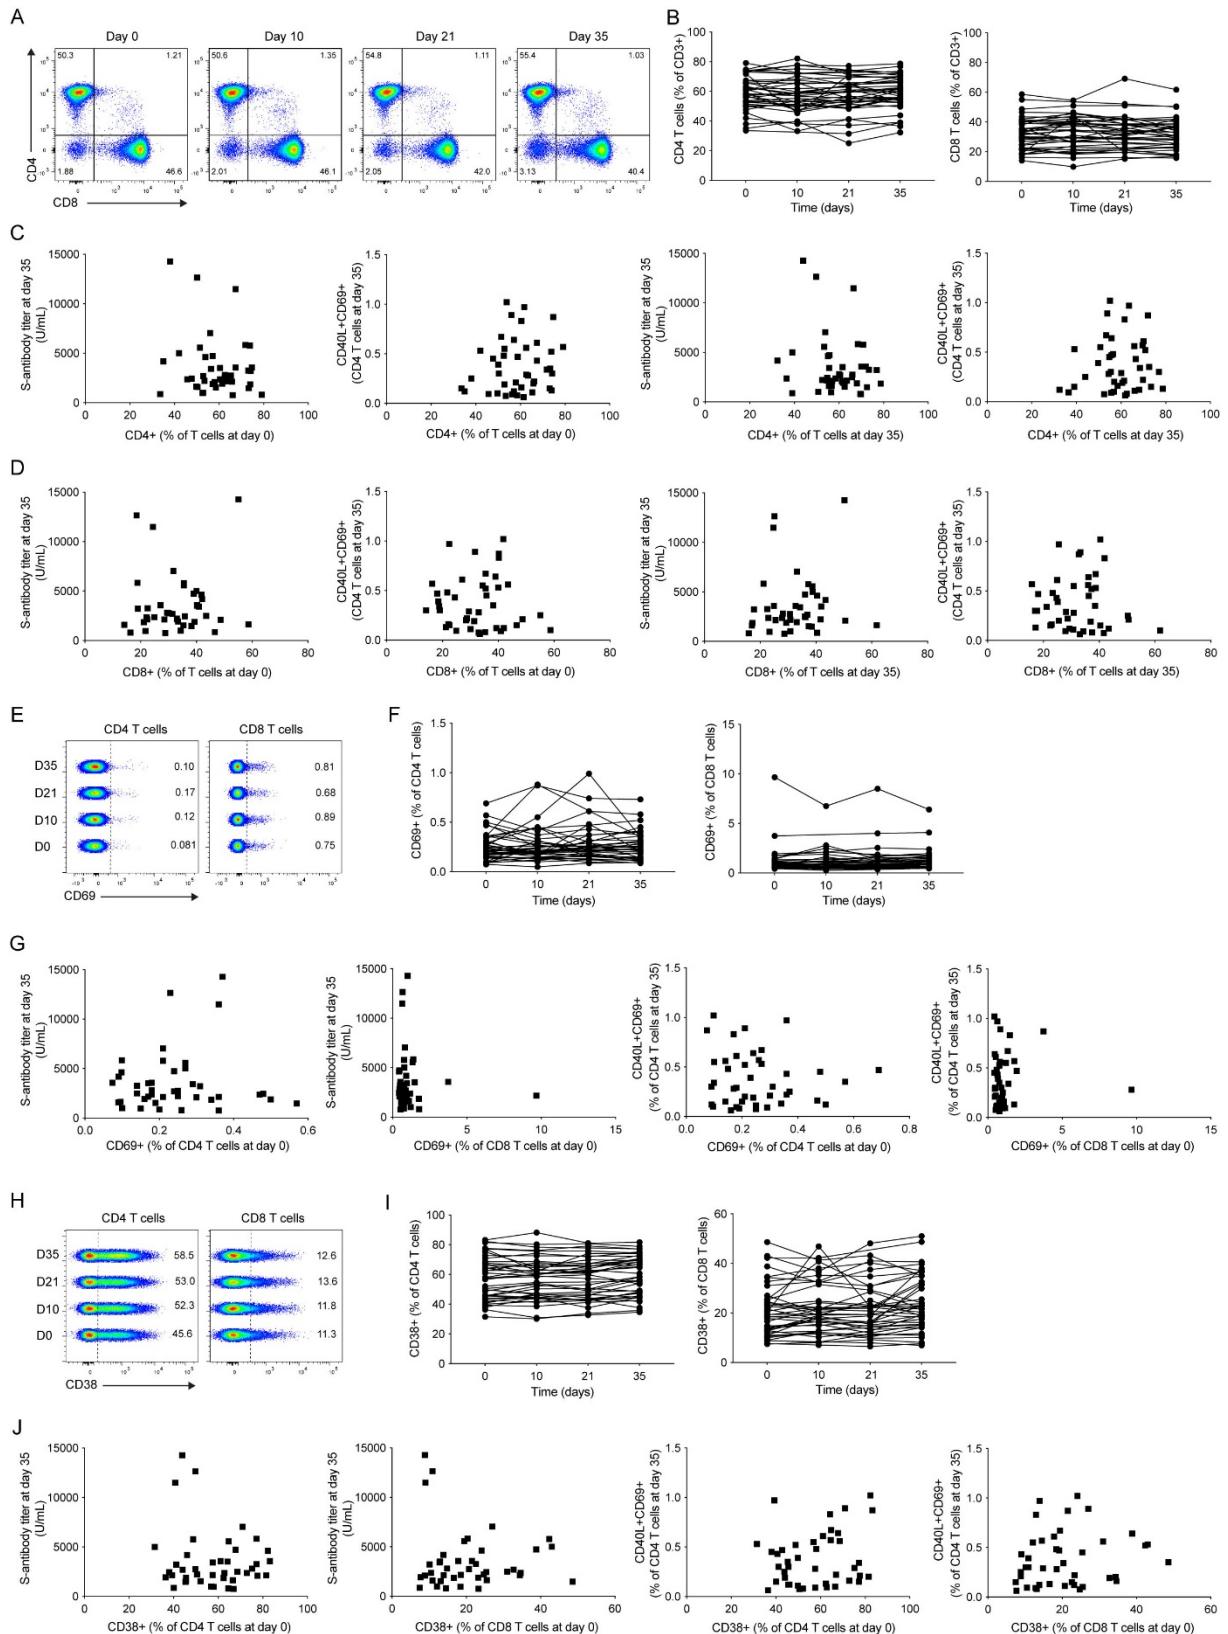

**Fig. S3.** No significant changes or associations between the overall non-MAIT T cell compartment and adaptive immune responses to the BNT162b2 mRNA vaccine. Representative flow cytometry plots (A) and combined data (B) of the percentage of CD8 and CD4 T cells among non-MAIT CD3+ cells at different time points in the healthy donor (HD)

group. In this analysis MAIT cells were gated out from the T cell gate. Correlation analysis between the percentage of CD4 T cells (C) and CD8 T cells (D) at day 0 and at day 35 with the spike-antibody titer at day 35 and the CD40L+CD69+ CD4 T cells at day 35. Concatenated flow cytometry plots (E) and combined data (F) of the CD69 expression on CD4 and CD8 T cells at different time points in the HD group. (G) Correlation analysis between the percentage of CD69+ CD4 T cells or CD69+ CD8 T cells at day 0 and the spike-antibody titer at day 35 and the CD40L+CD69+ CD4 T cells at day 35. Concatenated flow cytometry plots (H) and combined data (I) of the CD38 expression on CD4 and CD8 T cells at different time points in the HD group. (J) Correlation analysis between the percentage of CD38+ CD4 T cells or CD38+ CD8 T cells at day 0 with the spike-antibody titer at day 35 and the CD40L+CD69+ CD4 T cells at day 35. Correlations were assessed using the Spearman test in (C), (G) and (J), and no significant correlations were found.

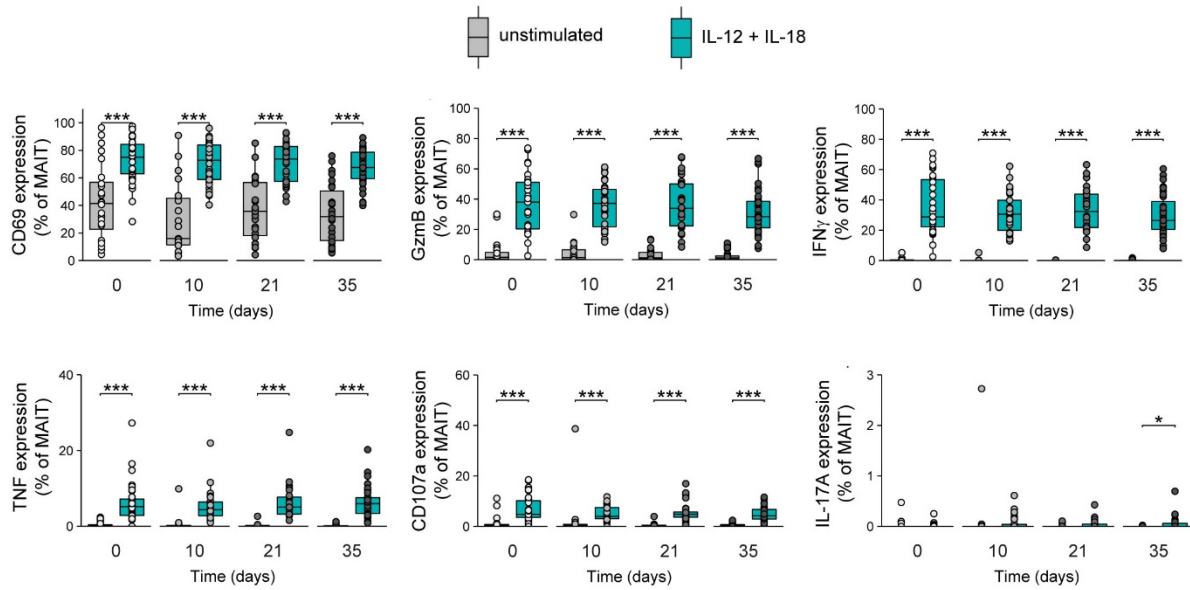

**Fig. S4.** Preserved MAIT cell response to IL-12 and IL-18 co-stimulation throughout BNT162b2 mRNA vaccination. Comparison of expression levels of CD69, GzmB, IFN $\gamma$ , TNF, CD107a or IL-17A on unstimulated MAIT cells (gray) and MAIT cells stimulated for 24 h with IL-12 (10 ng/mL) and IL-18 (100 ng/mL, green). Significance was assessed by Kruskal-Wallis and post hoc Dunn's test for multiple comparison with adjustment of p-values by Benjamini-Hochberg correction. \*p<0.05; \*\*\*p<0.001.

**Table S1.** Flow cytometry antibodies and reagents used in the phenotype panel.

| Reagent name                  | Clone    | Source         |
|-------------------------------|----------|----------------|
| Anti-human CD8 BUV395         | RPA-T8   | BD Biosciences |
| Anti-human CD16 BUV496        | 3G8      |                |
| Anti-human CD56 BUV563        | NCAM16.2 |                |
| Anti-human CD38 BUV661        | HIT2     |                |
| Anti-human CD69 BUV737        | FN50     |                |
| Anti-human CD45 BUV805        | HI30     |                |
| Anti-human CD4 Bv750          | SK3      |                |
| Anti-human CD3 Bv785          | SK7      |                |
| Anti-human CD14 BB700         | MOP9     |                |
| Anti-human perforin BB755     | dG9      |                |
| Anti-human Granzyme B BB790   | GB11     |                |
| Anti-human CD161 PE-Cy5       | DX12     |                |
| Anti-human CCR7 Bv421         | QA17A04  |                |
| Anti-human CD15 V500          | W6D3     |                |
| Anti-human CD45RA Bv570       | HI100    |                |
| Anti-human CXCR3 Bv650        | G025H7   |                |
| Anti-human CD127 Bv711        | A019D5   |                |
| Anti-human Ki67 AF488         | Ki-67    |                |
| Anti-human V $\alpha$ 7.2 APC | 3C10     |                |
| Anti-human CD19 APCFire 750   | HIB19    |                |

*Boulouis et al. Additional file 1*

|                                            |                |                                              |
|--------------------------------------------|----------------|----------------------------------------------|
| Anti-human PD-1 PE-Cy7                     | J105           | eBiosciences                                 |
| Live/Dead fixable aqua dead cell stain kit | not applicable | Invitrogen                                   |
| Human MR1-5-OP-RU tetramer PE              | not applicable | NIH Tetramer Core Facility, Emory University |



**Table S2.** Flow cytometry antibodies and reagent used in the functional panel.

| Reagent name                               | Clone          | Source                                       |
|--------------------------------------------|----------------|----------------------------------------------|
| Anti-human CD69 BUV395                     | FN50           | BD Biosciences                               |
| Anti-human CD56 BUV737                     | NCAM16.2       |                                              |
| Anti-human CD14 V500                       | M5E2           |                                              |
| Anti-human CD19 V500                       | HIB19          |                                              |
| Anti-human CD107a FITC                     | H4A3           |                                              |
| Anti-human CD161 PE-Cy5                    | DX12           |                                              |
| Anti-human TNF PE-Cy7                      | Mab11          |                                              |
| Anti-human Granzyme B AF700                | GB11           |                                              |
| Anti-human CD4 APC-H7                      | SK3            |                                              |
| Anti-human IL17A Bv421                     | BC168          | Biolegend                                    |
| Anti-human CD8 Bv570                       | RPA-T8         |                                              |
| Anti-human CD3 Bv650                       | OKT3           |                                              |
| Anti-human CD16 Bv711                      | 3G8            |                                              |
| Anti-human IFN $\gamma$ Bv785              | 4SB34          |                                              |
| Anti-human V $\alpha$ 7.2 PE               | 3C10           |                                              |
| Live/Dead fixable aqua dead cell stain kit | not applicable | Invitrogen                                   |
| Human MR1-5-OP-RU tetramer APC             | not applicable | NIH Tetramer Core Facility, Emory University |

**Table S3.** Key resource table.

| Reagent or Resource                     | Source         | Identifier                   |
|-----------------------------------------|----------------|------------------------------|
| <b>Antibodies</b>                       |                |                              |
| Anti-human CD8 BUV395 (cloneRPA-T8)     | BD Biosciences | Cat#563795; RRID: AB_2722501 |
| Anti-human CD16 BUV496 (Clone3G8)       | BD Biosciences | Cat# 612928, RRID:AB_2870213 |
| Anti-human CD56 BUV563 (Clone NCAM16.2) | BD Biosciences | Cat# 612928, RRID:AB_2870213 |
| Anti-human CD38 BUV661 (CloneHIT2)      | BD Biosciences | Cat# 612969, RRID:AB_2870242 |
| Anti-human CD69 BUV737 (CloneFN50)      | BD Biosciences | Cat# 612817, RRID:AB_2870141 |
| Anti-human CD45 BUV805 (Clone HI30)     | BD Biosciences | Cat# 612891, RRID:AB_2870179 |
| Anti-human CD4 BV750 (CloneSK3)         | BD Biosciences | Cat# 566355, RRID:AB_2744426 |
| Anti-human CD3 BV785 (CloneSK7)         | BD Biosciences | Cat# 563799, RRID:AB_2744384 |
| Anti-human CD14 BB700 (Clone MOP9)      | BD Biosciences | Cat# 566465, RRID:AB_2739737 |
| Anti-human CD161 PECy5 (Clone CX12)     | BD Biosciences | Cat# 551138, RRID:AB_394068  |
| Anti-human Perforin BB755 (Clone dG9)   | BD Biosciences | Cat#6244361; NA              |
| Anti-human Granzyme BB790 (Clone GB11)  | BD Biosciences | Cat#624296; NA               |
| Anti-human CD69 BUV395 (CloneFN50)      | BD Biosciences | Cat# 564364, RRID:AB_2738770 |
| Anti-human CD56 BUV737 (Clone NCAM16.2) | BD Biosciences | Cat# 564447, RRID:AB_2744432 |

*Boulouis et al. Additional file 1*

|                                              |                |                                  |
|----------------------------------------------|----------------|----------------------------------|
| Anti-human CD14 V500 (Clone M5E2)            | BD Biosciences | Cat# 561391,<br>RRID:AB_10611856 |
| Anti-human CD19 V500 (CloneHIB19)            | BD Biosciences | Cat# 561125,<br>RRID:AB_10563208 |
| Anti-human CD4 APCH7 (Clone SK3)             | BD Biosciences | Cat# 641398,<br>RRID:AB_1645732  |
| Anti-human TNF- $\alpha$ PECy7 (Clone Mab11) | BD Biosciences | Cat# 557647,<br>RRID:AB_396764   |
| Anti-human Granzyme B AF700 (Clone GB11)     | BD Biosciences | Cat# 561016,<br>RRID:AB_2033973  |
| Anti-human CCR7 BV421 (Clone G043H7)         | BioLegend      | Cat# 353208,<br>RRID:AB_11203894 |
| Anti-human CD15 V500 (CloneW6D3)             | BioLegend      | Cat# 323028,<br>RRID:AB_2563400  |
| Anti-human CD45RA BV570(Clone HI100)         | BioLegend      | Cat# 304132,<br>RRID:AB_2563813  |
| Anti-human CD57 BV605 (Clone QA17A04)        | BioLegend      | Cat# 393304,<br>RRID:AB_2728426  |
| Anti-human CXCR3 BV650 (Clone G025H7)        | BioLegend      | Cat# 353730,<br>RRID:AB_2563870  |
| Anti-human CD127 BV711 (Clone A019D5)        | BioLegend      | Cat# 351328,<br>RRID:AB_2562908  |
| Anti-human CD19 APCFire 750 (Clone HIB19)    | BioLegend      | Cat# 302258,<br>RRID:AB_2629691  |
| Anti-human Ki67 AF488 (Clone Ki-67)          | BioLegend      | Cat# 350508,<br>RRID:AB_10933085 |
| Anti-human CD8 BV570 (Clone RPA-T8)          | BioLegend      | Cat# 301037,<br>RRID:AB_10933259 |
| Anti-human CD3 BV650 (Clone OKT3)            | BioLegend      | Cat# 317324,<br>RRID:AB_2563352  |

*Boulouis et al. Additional file 1*

|                                                            |                                                    |                                                                                                             |
|------------------------------------------------------------|----------------------------------------------------|-------------------------------------------------------------------------------------------------------------|
| Anti-human CD16 BV711 (Clone 3G8)                          | BioLegend                                          | Cat# 302044,<br>RRID:AB_2563802                                                                             |
| Anti-human Va7.2 APC (Clone 3C10)                          | BioLegend                                          | Cat# 351708<br>RRID:AB_10933246                                                                             |
| Anti-human Va7.2 PE (Clone 3C10)                           | BioLegend                                          | Cat# 351706<br>RRID:AB_10899577                                                                             |
| Anti-IFN $\gamma$ BV421 (Clone 4SB34)                      | BioLegend                                          | Cat# 502542,<br>RRID:AB_2563882)                                                                            |
| Anti-human PD-1 PECy7 (CloneJ105)                          | eBiosciences                                       | Cat# 25-2799-42,<br>RRID:AB_10853804                                                                        |
| Human MR1-5-OP-RU tetramer PE                              | NIH Tetramer Core<br>Facility, Emory<br>University | <a href="https://tetramer.yerkes.emory.edu/reagents/mr1">https://tetramer.yerkes.emory.edu/reagents/mr1</a> |
| Human MR1-5-OP-RU tetramer APC                             | NIH Tetramer Core<br>Facility, Emory<br>University | <a href="https://tetramer.yerkes.emory.edu/reagents/mr1">https://tetramer.yerkes.emory.edu/reagents/mr1</a> |
| <b>Chemicals, peptides, and recombinant proteins</b>       |                                                    |                                                                                                             |
| Lymphoprep                                                 | STEM CELL                                          | 04-03-9391/02                                                                                               |
| Complete RPMI 1640 medium                                  | Gibco                                              | Cat#31870-025                                                                                               |
| 2-mM Glutamine                                             | Invitrogen                                         | Cat#25030149                                                                                                |
| Penicillin and streptomycin                                | Invitrogen                                         | Cat#15070063                                                                                                |
| Brilliant stain buffer                                     | BD Biosciences                                     | Cat#563794                                                                                                  |
| LIVE/DEAD Fixable Aqua Dead cell stain kit                 | Invitrogen                                         | Cat#L34957                                                                                                  |
| Bovine Serum Albumin                                       | Sigma                                              | Cat# A7030-100G                                                                                             |
| eBioscience FoxP3/Transcription factor staining buffer set | eBiosciences                                       | Cat#00-5523-00                                                                                              |
| Fixation/permeabilization Solution Kit (Cytofix/Cytoperm)  | BD Biosciences                                     | Cat#554714                                                                                                  |
| BD GolgiStop                                               | BD Biosciences                                     | Cat#554724                                                                                                  |
| BD GolgiPlug                                               | BD Biosciences                                     | Cat#555029                                                                                                  |

|                                   |                   |                                                                                                                                       |
|-----------------------------------|-------------------|---------------------------------------------------------------------------------------------------------------------------------------|
| IL-12p70                          | Peprotech         | Cat#200-12-100                                                                                                                        |
| IL-18                             | MBL               | Cat#B001.5                                                                                                                            |
| <b>Critical commercial assays</b> |                   |                                                                                                                                       |
| Elecsys Anti-SARS-CoV-2           | Roche Diagnostics | Cat# 09289267190                                                                                                                      |
| <b>Software and algorithms</b>    |                   |                                                                                                                                       |
| FlowJo                            | FlowJo            | v10.7.2 and v10.8                                                                                                                     |
| GraphPad Prism                    | GraphPad          | v9.1.0                                                                                                                                |
| FACSDiva software                 | BD Biosciences    | V8.0.1                                                                                                                                |
| Adobe Illustrator                 | Adobe             | V26.0.1                                                                                                                               |
| BioRender                         |                   | <a href="https://biorender.com/">https://biorender.com/</a>                                                                           |
| R (v4.1.1)                        | R Foundation      |                                                                                                                                       |
| Hmisc (v4.6.0)                    | R environment     | <a href="https://cran.r-project.org/web/packages/Hmisc/index.html">https://cran.r-project.org/web/packages/Hmisc/index.html</a>       |
| Corrplot (v 0.9.0)                | R environment     | <a href="https://cran.r-project.org/web/packages/corrplot/index.html">https://cran.r-project.org/web/packages/corrplot/index.html</a> |
| Rstatix (v0.7.0)                  | R environment     | <a href="https://cran.r-project.org/web/packages/rstatix/index.html">https://cran.r-project.org/web/packages/rstatix/index.html</a>   |
| ggplot2 (v3.3.5)                  | R environment     | <a href="https://cran.r-project.org/web/packages/ggplot2/index.html">https://cran.r-project.org/web/packages/ggplot2/index.html</a>   |

*Boulouis et al. Additional file 1*

|                             |                                     |                                                                             |
|-----------------------------|-------------------------------------|-----------------------------------------------------------------------------|
| SPICE (v6.1)                | NIH/NIAID<br>(Roederer et al, 2011) | <a href="https://niaid.github.io/spice/">https://niaid.github.io/spice/</a> |
| <b>Other</b>                |                                     |                                                                             |
| Analyzer Cobas 8000 e801pro | Diagnostics Roche                   |                                                                             |
| BD FACSymphony A5           | BD Biosciences                      |                                                                             |
| BD LSRFortessa              | BD Biosciences                      |                                                                             |
